# Supplementary material
Source: PubMed Central journal article supplement (PMC4242458)

# Individual variation of human sphingosine 1-phosphate receptor 1 coding sequence leads to heterogeneity in receptor function and drug interactions

Hideru Obinata<sup>1</sup>, Sarah Gutkind<sup>1</sup>, Jeremiah Stitham<sup>2</sup>, Toshiaki Okuno<sup>3</sup>, Takehiko Yokomizo<sup>3</sup>, John Hwa<sup>2</sup>, Timothy Hla<sup>1\*</sup>

## Supplementary Materials:

Primers used for mutagenesis

A11D

Forward: 5'-cgctggtaaggaccaccgagctc-3'

Reverse: 5'-gagctgcgggtgctccttgaccagcg-3'

R13G

Forward: 5'-gtcaaggcccacggcagctcggctct-3'

Reverse: 5'-agaccgagctgccgtgggccttgac-3'

A39T

Forward: 5'-cacgggaaagctgaatatcagcacggataaagaaaatagtataaa-3'

Reverse: 5'-tttatactattttttatccgtgctgatattcagctttcccgtg-3'

I45T

Forward: 5'-ggacaaggagaacagcactaaactgacctcgggtg-3'

Reverse: 5'-ccaccgaggtcagtttagtgctgttctccttgcc-3'

P79S

Forward: 5'-ggaaaaccaagaattccaccgaagcatgtactatatttattggcaatc-3'

Reverse: 5'-gattgccaataaaatagfacatgcttcggtggaatttcttggtttcc-3'

R120P

Forward: 5'-cccagtggttctgccggaaggagatgtt-3'

Reverse: 5'-aacatactcccttcggcagaaaccactggg-3'

Y198C

Forward: 5'-cacctgtctgccgctctgccacaagcac-3'

Reverse: 5'-gtgcttggcagagcggcagcacggtg-3'

R238C

Forward: 5'-cgccgcctgacgttctgcaagaacattcca-3'

Reverse: 5'-tggaaatgttcttcagaaacgtcaggcggcg-3'

S245N

Forward: 5'-gcaagaacattccaaggccaaccgcagctctg-3'

Reverse: 5'-cagagctcgggtggccttgaaatgttcttgc-3'

G305C

Forward: 5'-ctgtgctcaactcctgcaccaacccatc-3'

Reverse: 5'-gatggggttggtgcaggagttgagcacag-3'

P332R

Forward: 5'-gctgcaagtgccggagcggagactc-3'

Reverse: 5'-gagtctccgctccggcacttgcagc-3'

R342P

Forward: 5'-ctggcaaattcaagccaccatcatcgccgg-3'

Reverse: 5'-ccggcgatgatgggtggcttgaattgccag-3'

G347S

Forward: 5'-cgacctatcatgccagcatgaattccacc-3'

Reverse: 5'-ggtggaattccatgctggcgatgatgggtcg-3'

S351G

Forward: 5'-cgccggcatggaattcgccgcagaaa-3'

Reverse: 5'-tttctgcggccgaattccatgccggcg-3'

Legends for supplemental figures

**Fig. S1.** Internalization of S1P<sub>1</sub> SNP mutants after S1P stimulation.

293T cells were transduced with lentivirus vectors for the expression of GFP-tagged S1P<sub>1</sub> mutants, starved overnight, then stimulated with 200 nM S1P for 1 h. The cells were fixed with paraformaldehyde, and the GFP signal was observed for the localization of the S1P<sub>1</sub> mutants under a confocal microscope system. Data are the representative of at least 3 independent experiments with the same tendency.

**Fig. S2.** Expression levels of wild type S1P<sub>1</sub>, I45T, R120P, and G305C mutants in CHO-K1 cells

CHO-K1 cells were transduced with lentivirus vectors for the expression of GFP-tagged S1P<sub>1</sub> mutants, and selected by puromycin. Expression levels of each mutant were examined by western blot analysis.

**Fig. S3.** Internalization of S1P<sub>1</sub> SNP mutants after FTY720-P stimulation.

293T cells were transduced with lentivirus vectors for the expression of GFP-tagged S1P<sub>1</sub> mutants, starved overnight, and stimulated with 10 nM FTY720-P for 1 h. The cells were fixed with paraformaldehyde, and the GFP signal was observed for the localization of the S1P<sub>1</sub> mutants under a confocal microscope system. Data are the representative of at least 3 independent experiments with the same tendency.

**Fig. S4.** Comparison between wild type S1P<sub>1</sub>, R13G, I45T and G305C mutants in TEER.

HUVECs were transduced with lentivirus vectors for the expression of GFP-tagged SNP mutants together with a vector for endogenous S1P<sub>1</sub>-specific shRNA. (A) Western blot analysis was performed to check the overexpression of wild type S1P<sub>1</sub>, I45T and G305C, and the suppression of endogenous S1P<sub>1</sub> by shRNA. The cells were starved, and stimulated with 100 nM BSA-bound S1P (B) or HDL-bound S1P (C). The changes in TEER were monitored in an ECIS  $\theta$  system (Applied Biophysics). Data are the representative of 3 independent experiments with the same tendency.

# Supplemental figures

## Fig. S1

WT

A11D

R13G

A39T

control

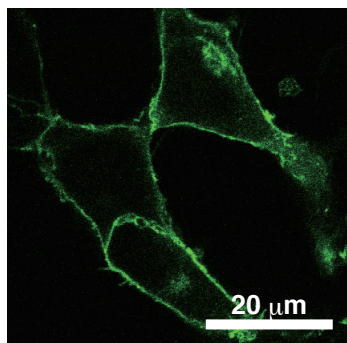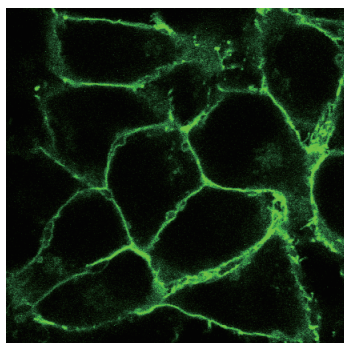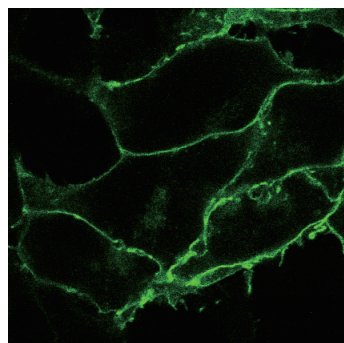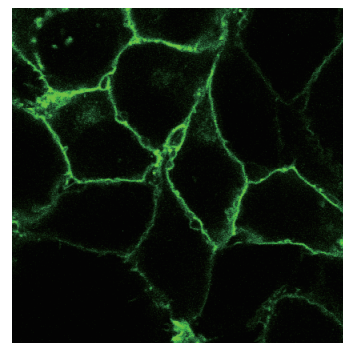

stimulated

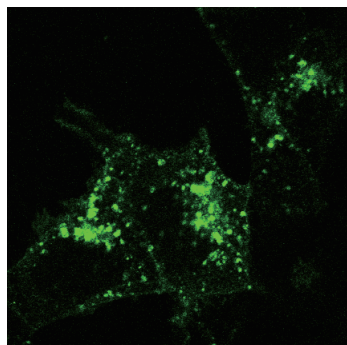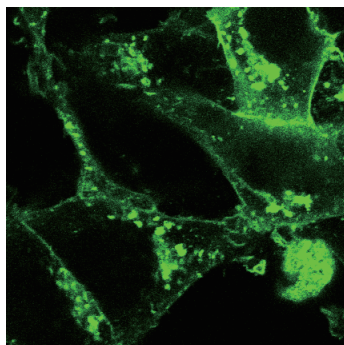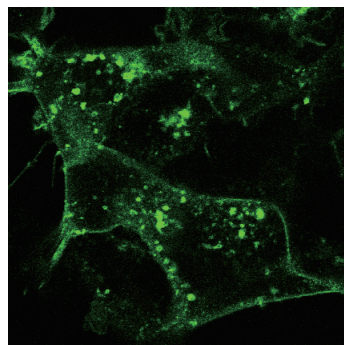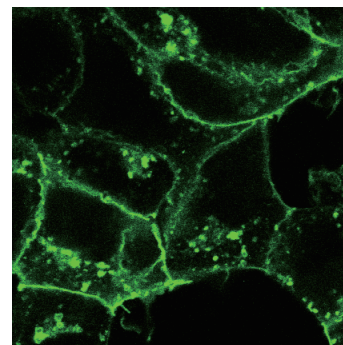

P79S

Y198C

R238C

S245N

control

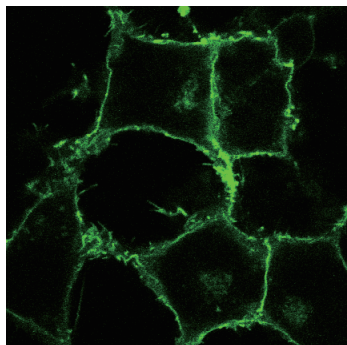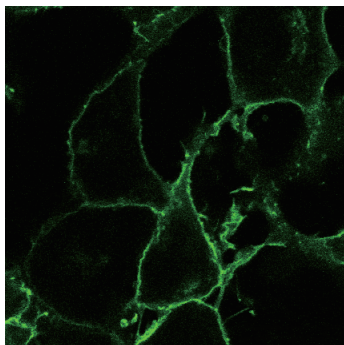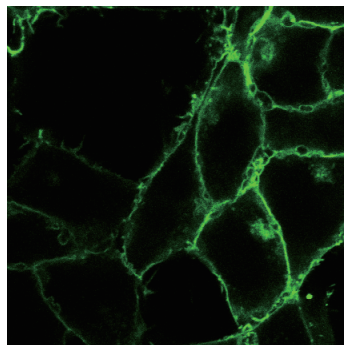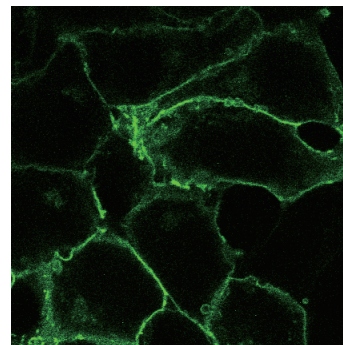

stimulated

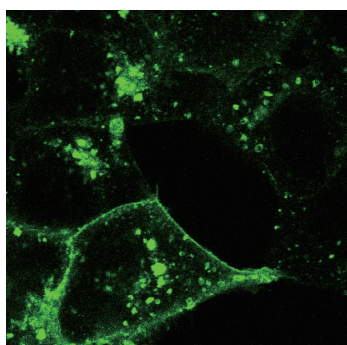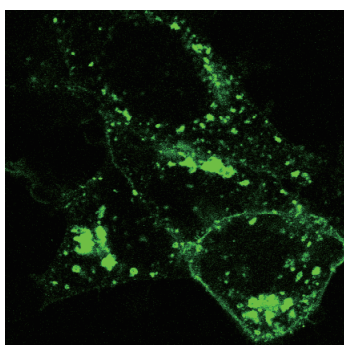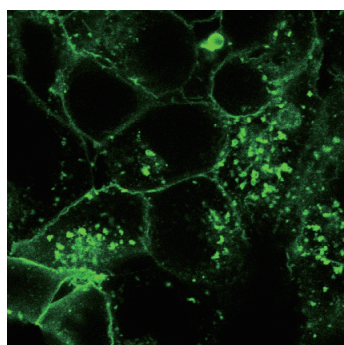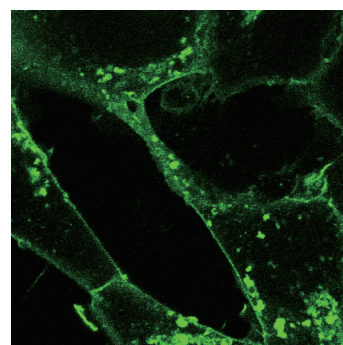

# Fig. S1 (continued)

P332R

R342P

G347S

S351G

control

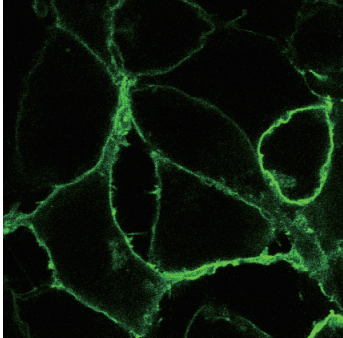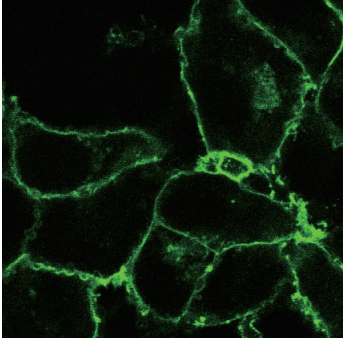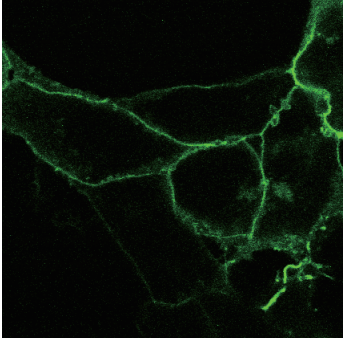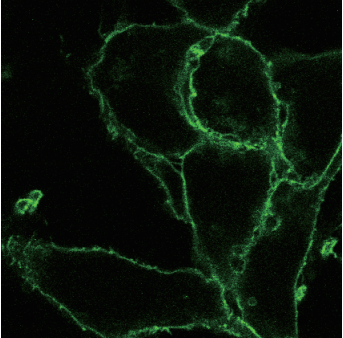

stimulated

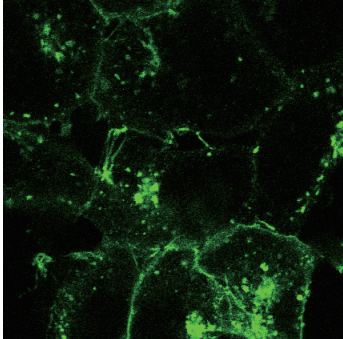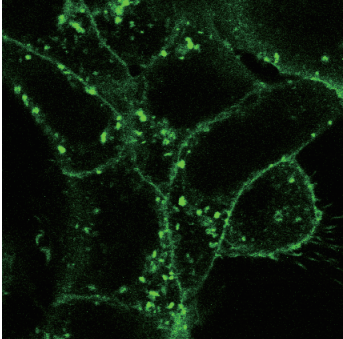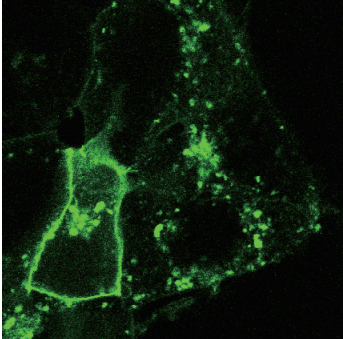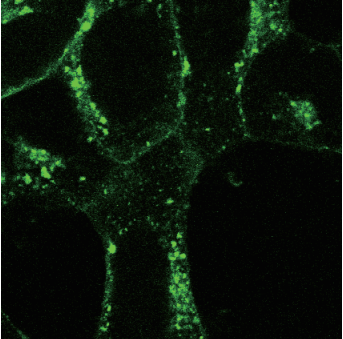

**Fig. S2**

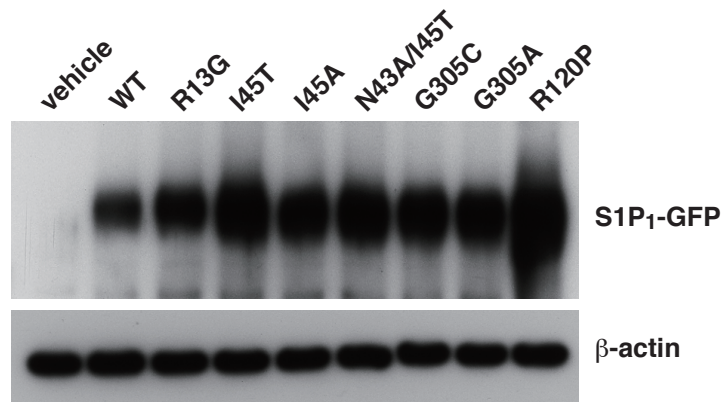

**Fig. S3**

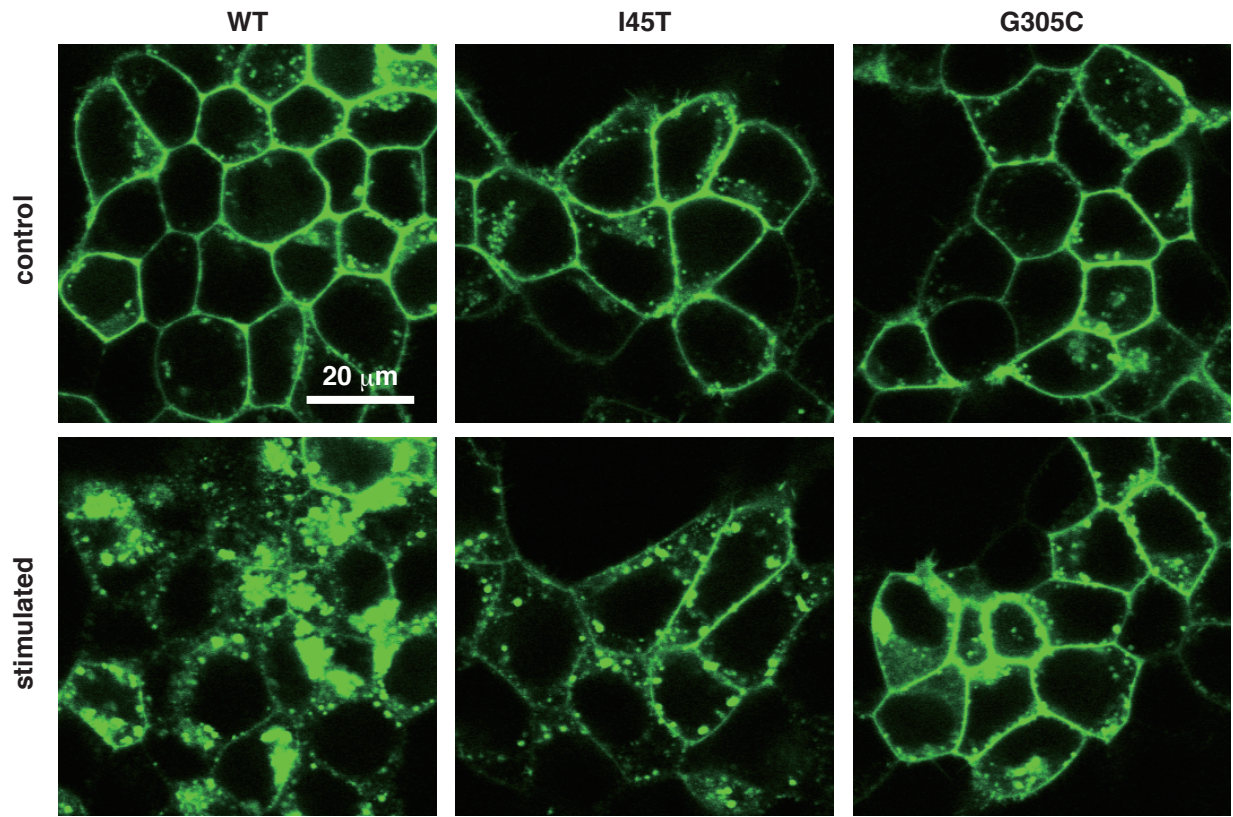



**Fig. S4**

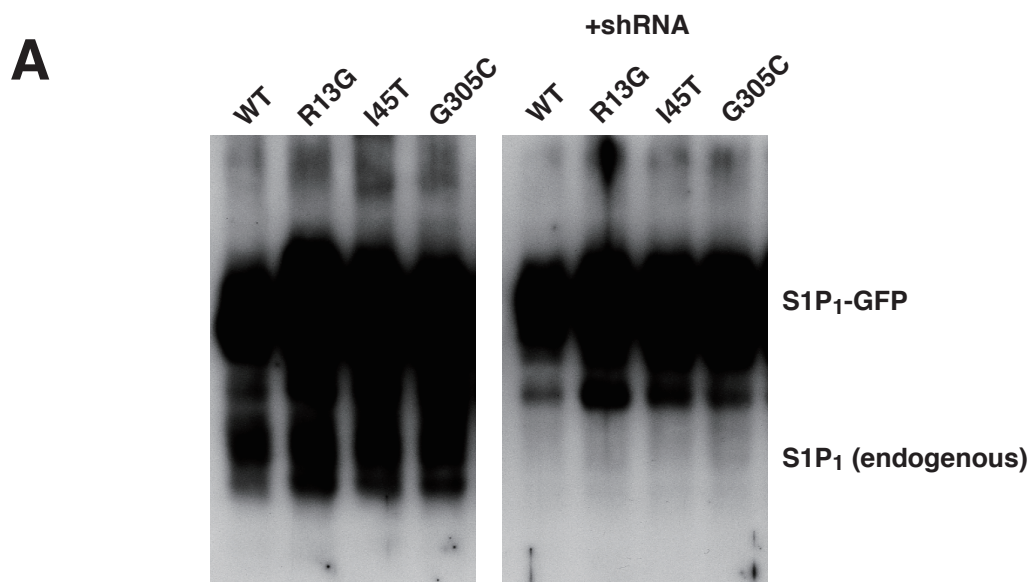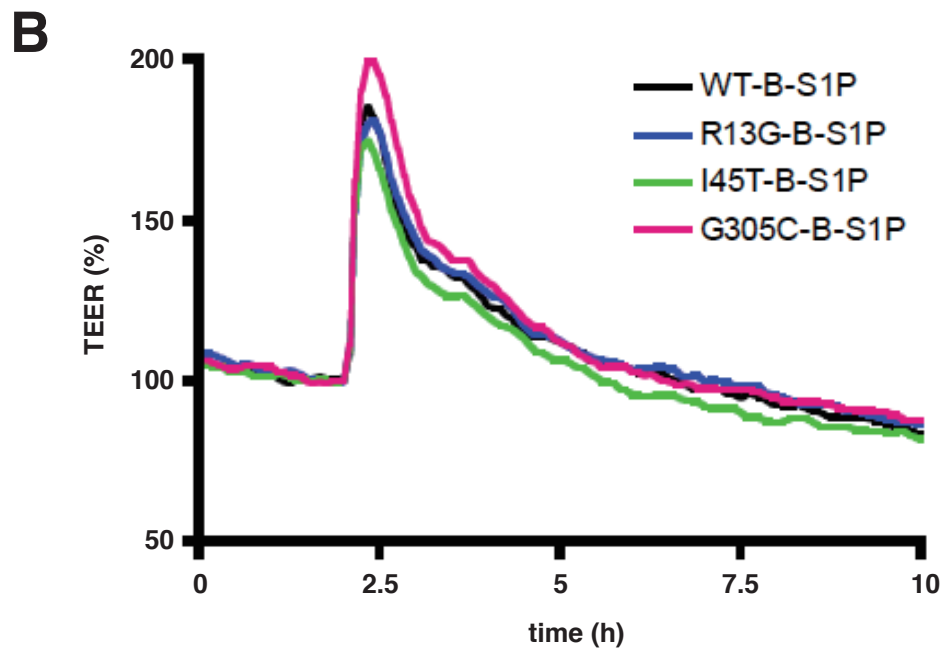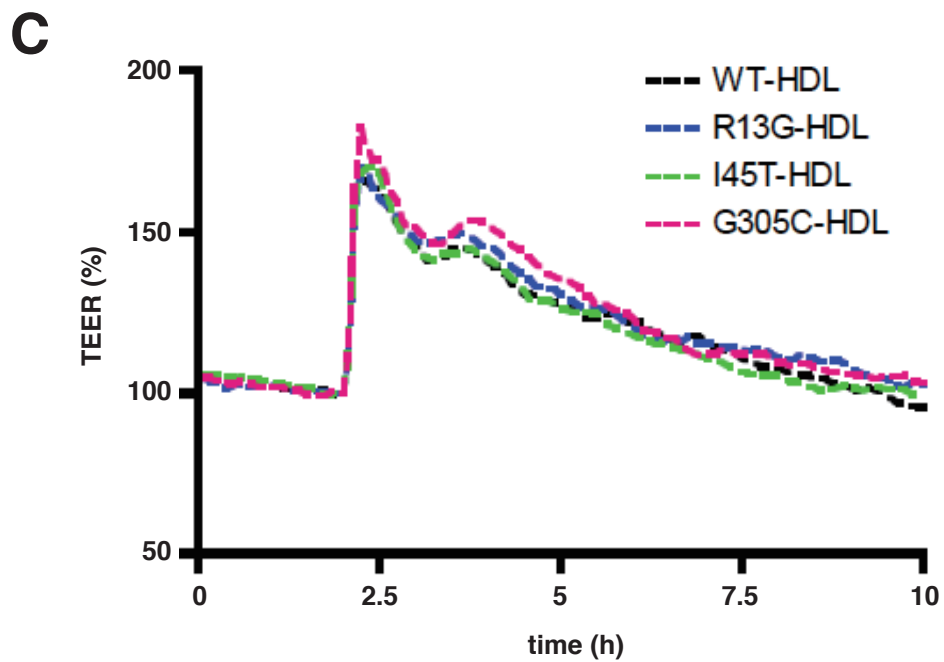

Supplement: supp_P054163_jlr.P054163-1.pdf [file supp_P054163_jlr.P054163-1.pdf]
